# Supplementary material
Source: PubMed Central journal article supplement (PMC3257911)
Supplement: supp_79.11.4533_IAI5016-11_ST1-ST4_SF1-SF3.pdf [file supp_79.11.4533_IAI5016-11_ST1-ST4_SF1-SF3.pdf]

# Supplementary Data

## Supplemental Tables

**TABLE S1.** Bacterial cell labeling efficiency experiment

| Strain         | Dilution     |              |              |              |              |              |              |
|----------------|--------------|--------------|--------------|--------------|--------------|--------------|--------------|
|                | 1:2          | 1:4          | 1:8          | 1:16         | 1:32         | 1:64         | 1:128        |
| PgC            | 47462        | 23447.3      | 11695.1      | 5826.7       | 2818.3       | 1420.6       | 718.2        |
| W50            | 38435        | 18613.3      | 9412         | 4634.7       | 2268         | 1147         | 575          |
| <b>W50/PgC</b> | <b>80.9%</b> | <b>79.4%</b> | <b>80.5%</b> | <b>79.5%</b> | <b>80.5%</b> | <b>80.7%</b> | <b>80.1%</b> |

The values were obtained after measuring the efficiency of FITC to label the WT W50 and capsule-deficient mutant PgC strains of bacteria. Serial dilutions of the labeled bacteria were made and the FITC values were recorded by a FluoStar Galaxy fluorescence plate reader (BMG Lab Technologies). Each bacteria dilution was run in triplicate and an average value was computed for each dilution factor. These averages were then converted to a ratio of W50/PgC to indicate the percentage of labeled W50 cells in relation to labeled PgC.

**TABLE S2. Role of capsule in *P. gingivalis* virulence.** Survival of bacteria in animals infected with  $3 \times 10^9$  of encapsulated W50 and non-encapsulated PgC strains (1).

Survival was determined by the number of colonies obtained following plating of sera/tissues derived from infected animals on blood agar plates. In the cases where there was too many colonies to count observed on plates a number 1000 was used. The duplicate columns for each strain designate numbers obtained from two plates.

| Mice | Sample     | W50  |     | PgC  |      | Control |   |
|------|------------|------|-----|------|------|---------|---|
| 1    | Blood #1   | 0    | 1   | 0    | 0    | 0       | 0 |
|      | Liver #1   | 0    | 0   | 0    | 0    | 0       | 0 |
|      | Abscess #1 | 0    | 60  | 4    | 0    | 0       | 0 |
|      | Spleen     | 0    | 0   | 0    | 0    |         |   |
| 2    | Blood #2   | 60   | 0   | 0    | 0    | 0       | 0 |
|      | Liver #2   | 1000 | 10  | 200  | 180  | 0       | 0 |
|      | Abscess #2 |      |     |      |      | 0       | 0 |
|      | Spleen     | 0    | 0   | 228  | 200  |         |   |
| 3    | Blood #3   | 96   | 108 | 0    | 0    |         |   |
|      | Liver #3   | 26   | 30  | 0    | 0    |         |   |
|      | Abscess #3 |      |     |      |      |         |   |
|      | Spleen     |      |     | 126  | 100  |         |   |
| 4    | Blood #4   |      |     | 0    | 0    |         |   |
|      | Liver #4   | 0    | 0   | 0    | 0    |         |   |
|      | Abscess #4 |      |     | 1000 | 1000 |         |   |
|      | Spleen     |      |     | 0    | 0    |         |   |
| 5    | Blood #5   | 194  | 202 | 0    | 0    |         |   |
|      | Liver #5   | 240  | 200 | 0    | 0    |         |   |
|      | Abscess #5 |      |     |      |      |         |   |
|      | Spleen     |      |     | 0    | 0    |         |   |
| 6    | Blood #6   | 17   | 0   | 0    | 0    |         |   |
|      | Liver #6   | 240  | 200 | 0    | 0    |         |   |
|      | Abscess #6 |      |     |      |      |         |   |
|      | Spleen     |      |     | 0    | -    |         |   |

**TABLE S3. Role of capsule in *P. gingivalis* virulence.** Survival of bacteria in animals infected with  $1 \times 10^{10}$  of encapsulated W50 and non-encapsulated PgC strains (1). Survival was determined by the number of colonies obtained following plating of sera/tissues derived from infected animals on blood agar plates. In the cases where there was too many colonies to count observed on plates a number 1000 was used. The duplicate columns for each strain designate numbers obtained from two plates.

| Mice | Sample     | W50  |      | PgC  |      | Control |   |
|------|------------|------|------|------|------|---------|---|
| 1    | Blood #1   | 0    | 0    | 0    | 0    | 0       | 0 |
|      | Liver #1   | 1000 | 1000 | 1000 | 1000 | 0       | 0 |
|      | Abscess #1 | 1000 | 1000 | 66   | 80   | 0       | 0 |
|      | Spleen     | 0    | 0    | 0    | 0    |         |   |
| 2    | Blood #2   | 0    | 0    | 0    | 0    | 0       | 0 |
|      | Liver #2   | 0    | 0    | 20   | 0    | 0       | 0 |
|      | Abscess #2 | 0    | 0    | 0    | 0    | 0       | 0 |
|      | Spleen     |      |      |      |      |         |   |
| 3    | Blood #3   | 0    | 0    | 30   | 22   |         |   |
|      | Liver #3   | 0    | 0    | 232  | 210  |         |   |
|      | Abscess #3 | 18   | 27   | 8    | 12   |         |   |
|      | Spleen     |      |      | 126  |      |         |   |
| 4    | Blood #4   | 1000 | 1000 | 0    | 0    |         |   |
|      | Liver #4   | 1000 | 1000 | 0    | 0    |         |   |
|      | Abscess #4 | 1000 | 1000 | 6    | 8    |         |   |
|      | Spleen     | 0    | 0    |      |      |         |   |
| 5    | Blood #5   | 22   | 0    | 0    | 0    |         |   |
|      | Liver #5   | 10   | 30   | 6    | 0    |         |   |
|      | Abscess #5 | 1000 | 1000 | 25   | 30   |         |   |
|      | Spleen     |      |      | 0    | 0    |         |   |
| 6    | Blood #6   | 39   | 32   | 30   | 50   |         |   |
|      | Liver #6   | 88   | 74   | 0    | 0    |         |   |
|      | Abscess #6 | 1000 | 1000 | 0    | 0    |         |   |
|      | Spleen     |      |      |      |      |         |   |
| 7    | Blood #7   | 0    | 0    |      |      |         |   |
|      | Liver #7   | 14   | 0    |      |      |         |   |
|      | Abscess #7 | 1000 | 1000 |      |      |         |   |
|      | Spleen#7   |      |      |      |      |         |   |

**TABLE S4.** Survival of bacteria in animals infected with  $3 \times 10^{10}$  of encapsulated W83 and non-encapsulated EPS strains (10). Survival was determined by the number of colonies obtained following plating of sera/tissues derived from infected animals on blood agar plates. In the cases where there was too many colonies to count observed on plates a number 1000 was used. The duplicate columns for each strain designate numbers obtained from two plates.

| Mice | Sample     | W83  |      | EpsC Mutant |     | Control |   |
|------|------------|------|------|-------------|-----|---------|---|
| 1    | Blood #1   | 0    | 0    | 0           | 0   | 0       | 0 |
|      | Liver #1   | 80   | 100  | 50          | 0   | 0       | 0 |
|      | Abscess #1 | 50   | 1000 | 0           | 1   | 0       | 0 |
| 2    | Blood #2   | 0    | 0    | 0           | 0   | 0       | 0 |
|      | Liver #2   | 0    | 0    | 0           | 0   | 0       | 0 |
|      | Abscess #2 | 1000 | 1000 | 0           | 0   | 0       | 0 |
| 3    | Blood #3   | 1000 | 1000 | 0           | 0   |         |   |
|      | Liver #3   | 1000 | 1000 | 0           | 0   |         |   |
|      | Abscess #3 | 1000 | 1000 | 0           | 0   |         |   |
| 4    | Blood #4   | 0    | 0    | 0           | 0   |         |   |
|      | Liver #4   | 0    | 0    | 30          | 21  |         |   |
|      | Abscess #4 | 1000 | 1000 | 60          | 75  |         |   |
| 5    | Blood #5   | 1000 | 1000 | 0           | 0   |         |   |
|      | Liver #5   | 1000 | 1000 | 16          | 22  |         |   |
|      | Abscess #5 | 1000 | 1000 | 0           | 0   |         |   |
| 6    | Blood #6   | 100  | 100  | 0           | 0   |         |   |
|      | Liver #6   | 0    | 0    | 0           | 0   |         |   |
|      | Abscess #6 | 0    | 0    | 0           | 0   |         |   |
| 7    | Blood #7   | 1000 | 1000 | 10          | 8   |         |   |
|      | Liver #7   | 1000 | 1000 | 1000        | 200 |         |   |
|      | Abscess #7 | 1000 | 1000 | 98          | 109 |         |   |

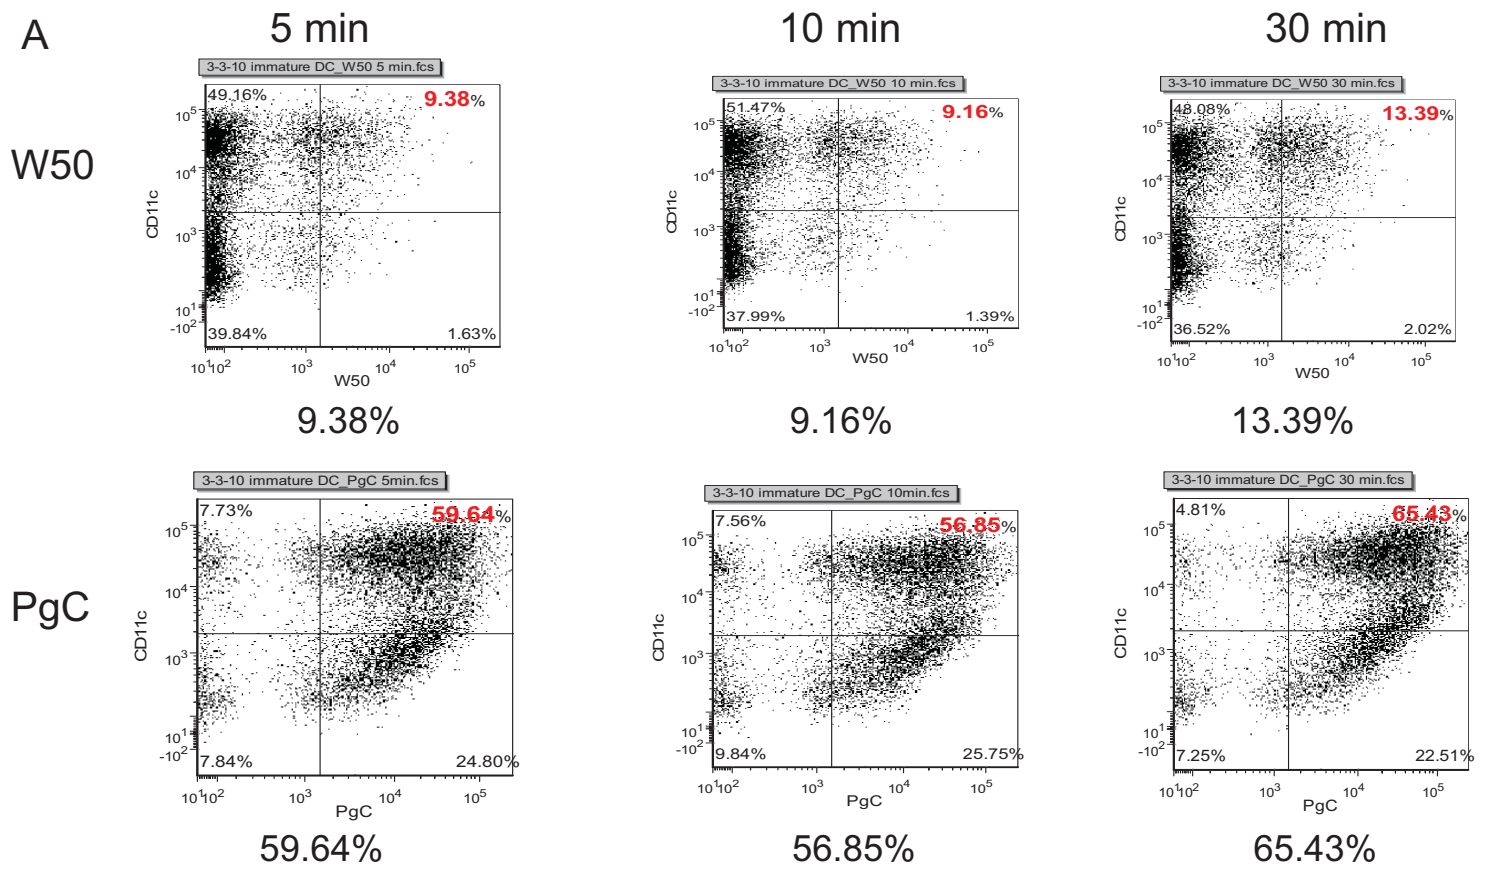

| Incubation Time | PgC Positive Dendritic Cells | W50 Positive Dendritic Cells |
|-----------------|------------------------------|------------------------------|
| 5 minutes       | 47.7%                        | 9.4%                         |
| 10 minutes      | 45.5%                        | 9.2%                         |
| 30 minutes      | 52.3%                        | 13.4%                        |

Fig. S1A. Phagocytosis by dendritic cells

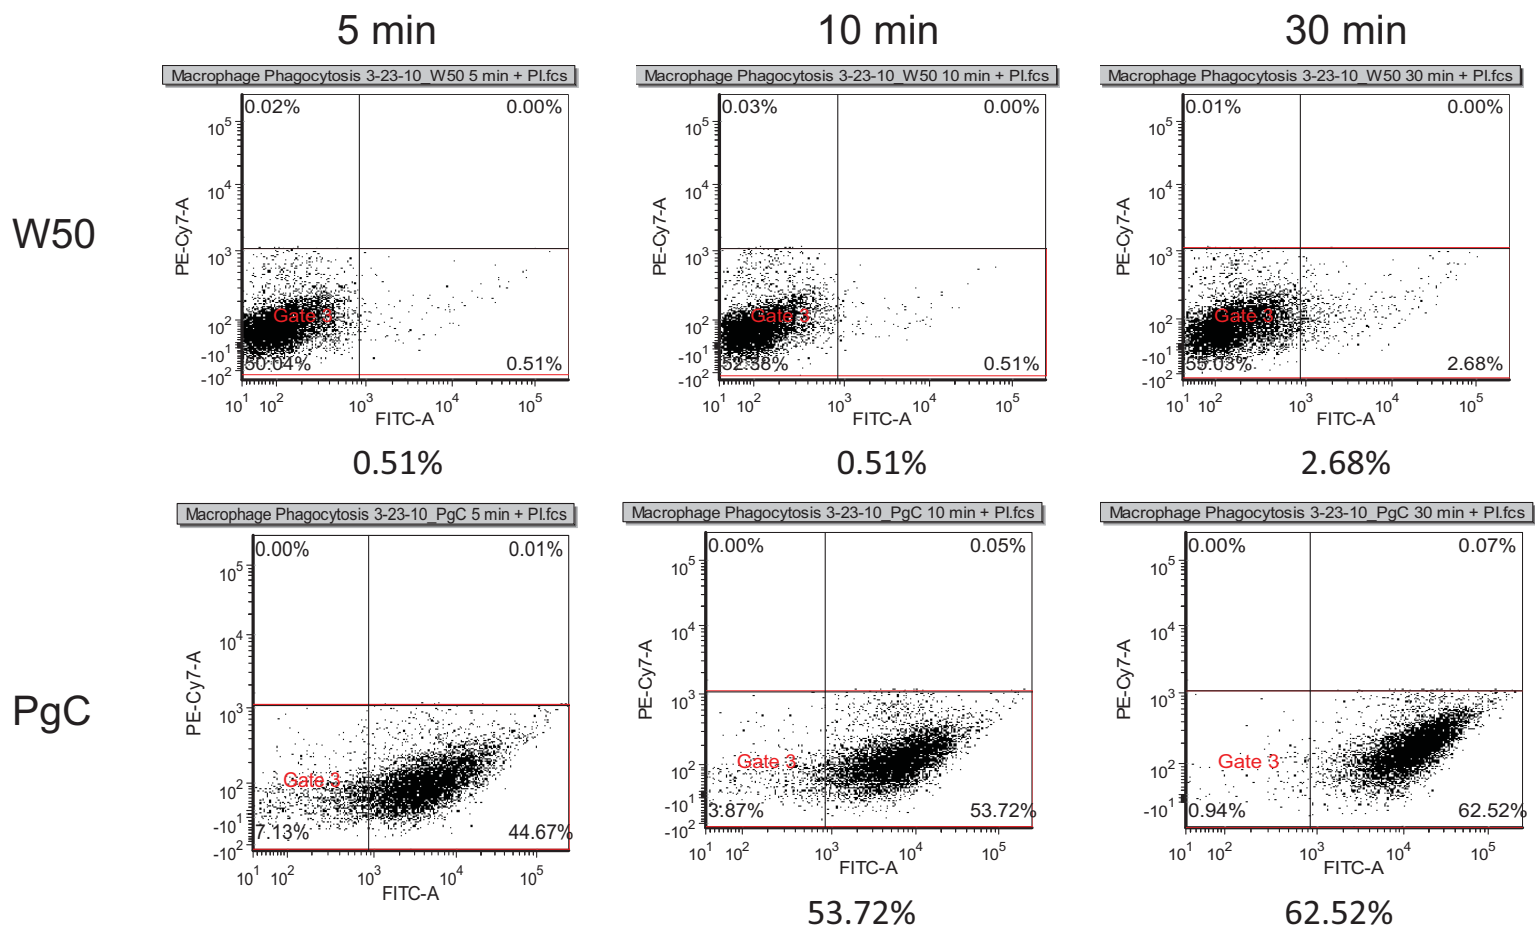

| Incubation Time | PgC Positive Macrophages | W50 Positive Macrophages |
|-----------------|--------------------------|--------------------------|
| 5 minutes       | 35.8%                    | 0.51%                    |
| 10 minutes      | 43.0%                    | 0.51%                    |
| 30 minutes      | 50.0%                    | 2.68%                    |

Fig. S1B. Phagocytosis by macrophages

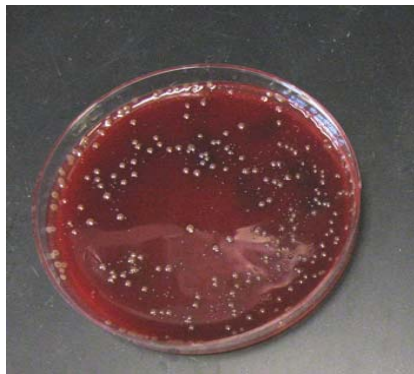

W50 1/10 dilution

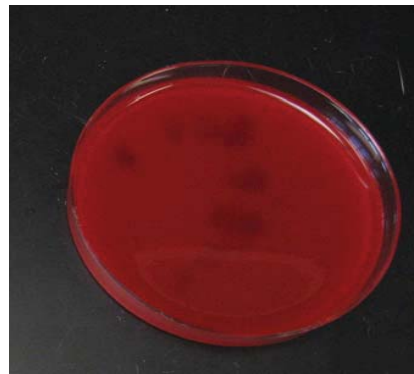

PgC 1/10 dilution

Figure S2A. Survival results for dendritic cells



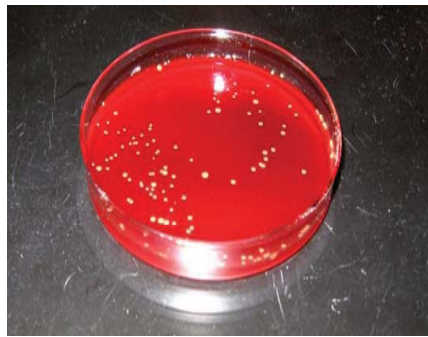

W50 1/4 dilution

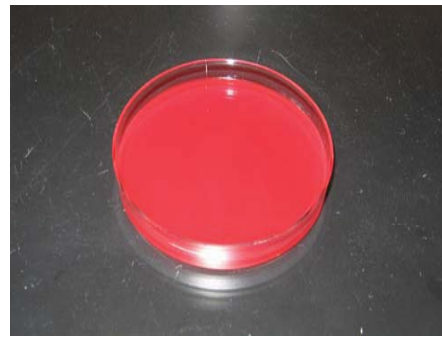

PgC 1/4 dilution

Figure S2B. Survival results for macrophages

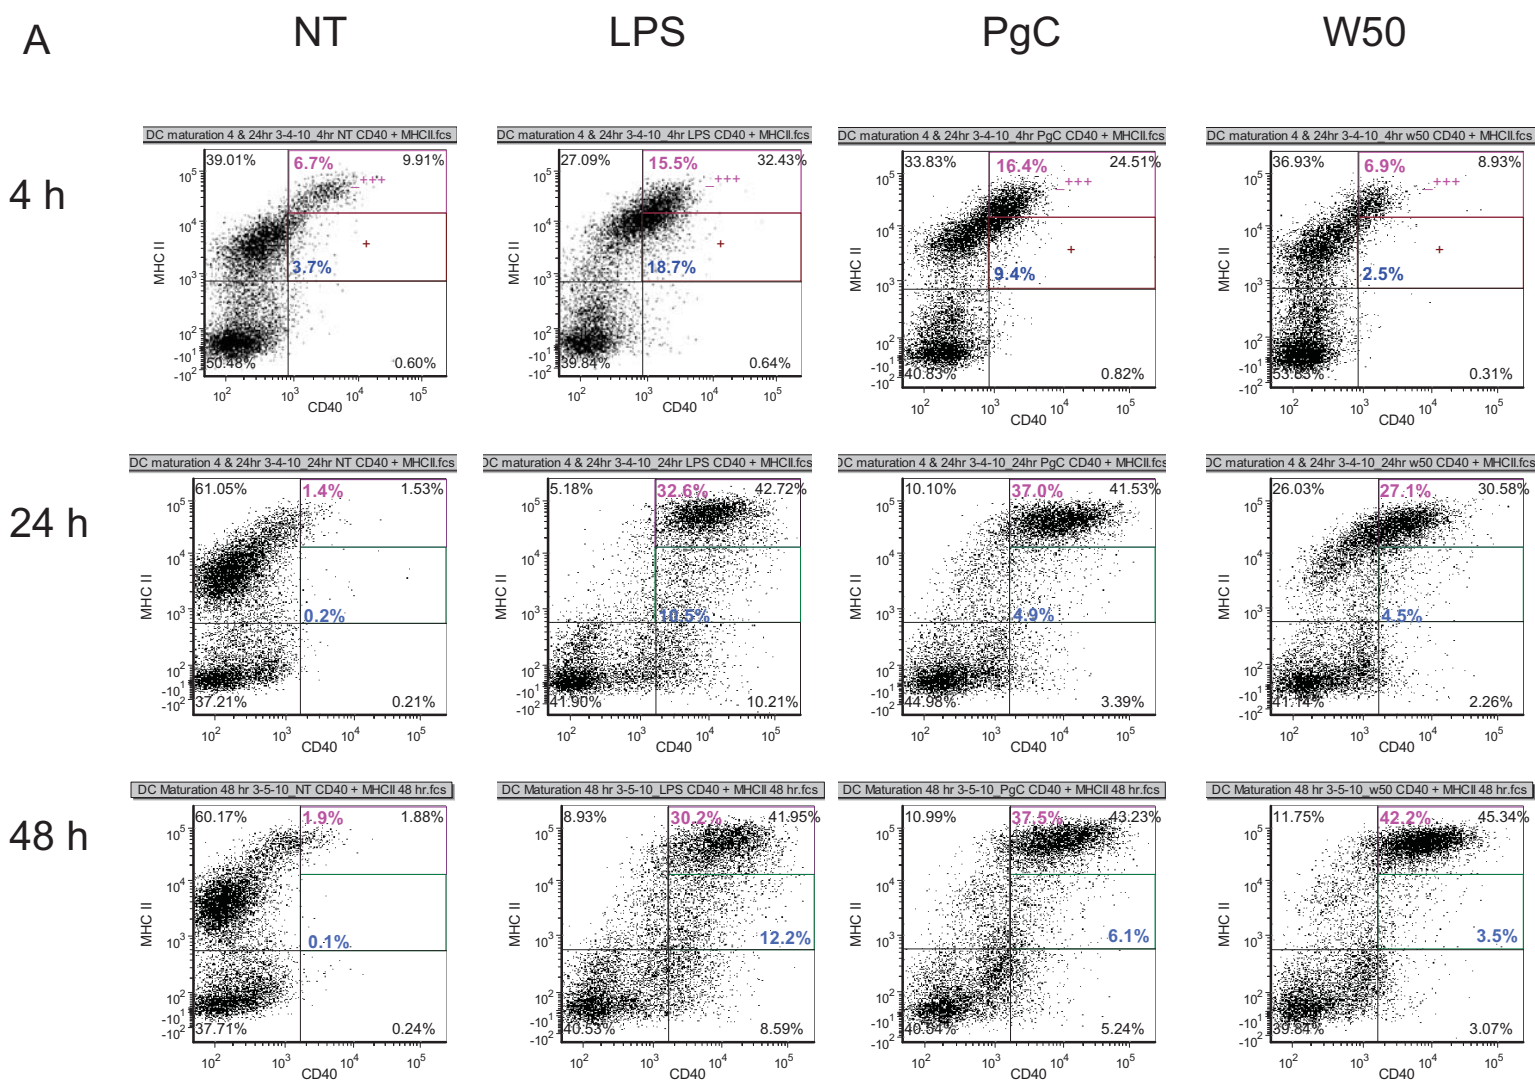

Fig. S3A. Maturation of dendritic cells

A

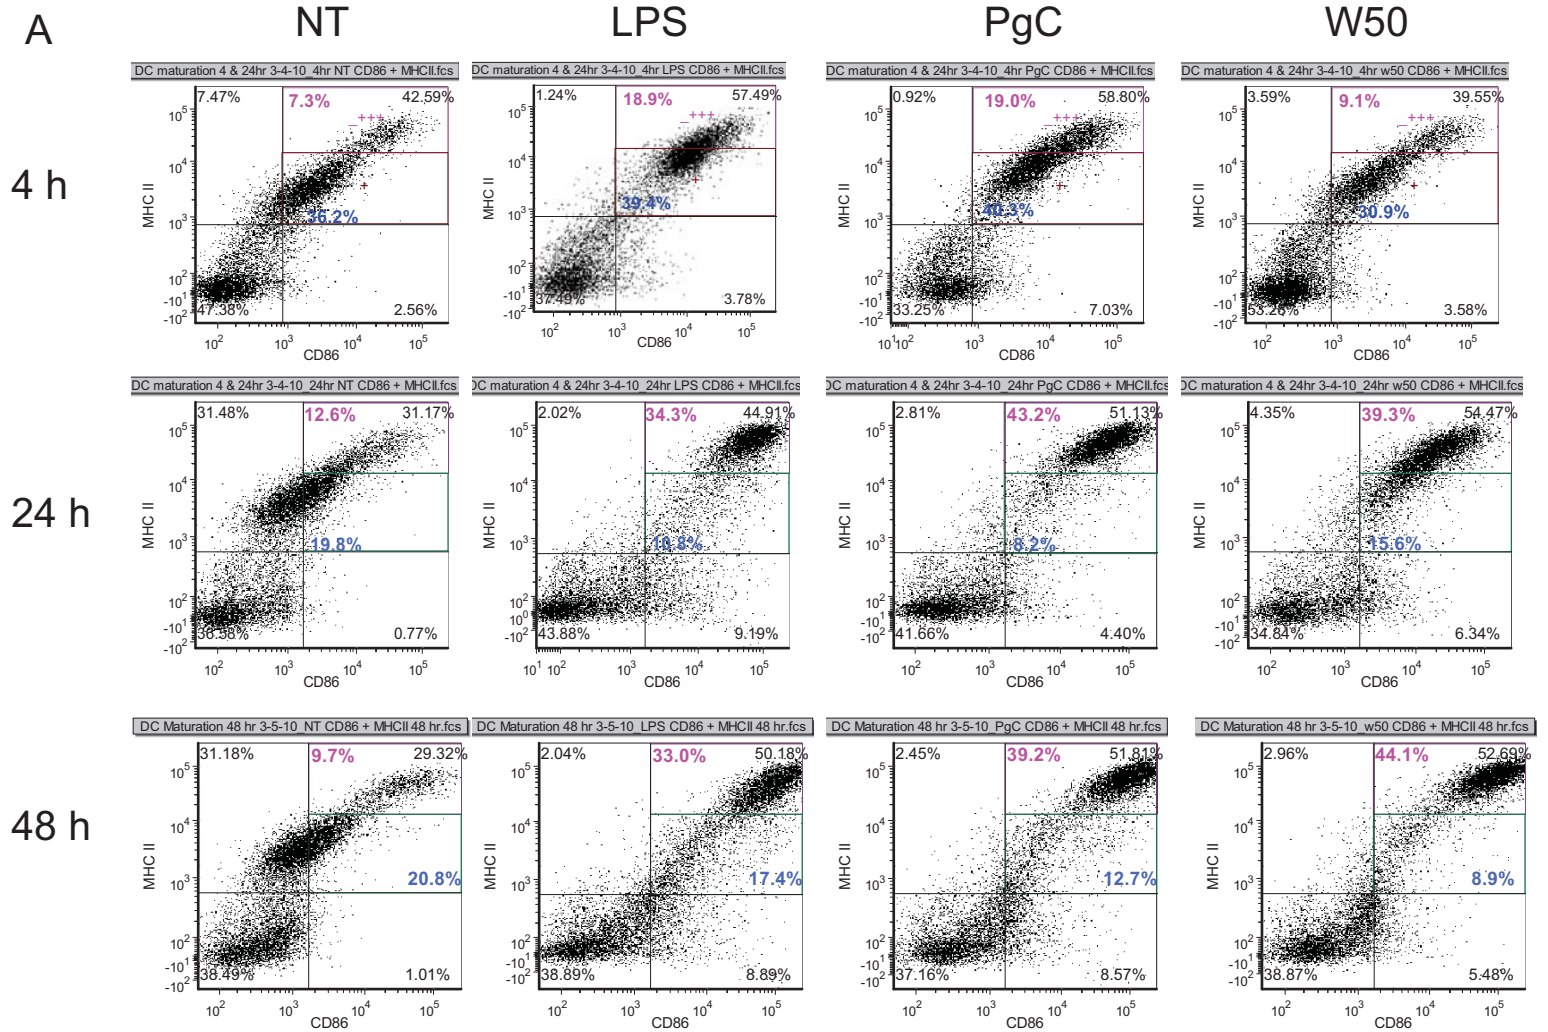

Fig. S3B. Maturation of dendritic cells

| DC Treatment                            | Maturation Marker | 4 hrs | 24 hrs | 48 hrs |
|-----------------------------------------|-------------------|-------|--------|--------|
| No treatment (NT)<br>(negative control) | CD11c + MHC II    | 7.9%  | 12.5%  | 11.5%  |
|                                         | CD40 + MHC II     | 6.7%  | 1.4%   | 1.9%   |
|                                         | CD86 + MHC II     | 7.3%  | 12.6%  | 9.7%   |
| LPS (positive control)                  | CD11c+ MHC II     | 21.8% | 31.6%  | 28.3%  |
|                                         | CD40 + MHC II     | 15.5% | 32.6%  | 30.2%  |
|                                         | CD86 + MHC II     | 18.9% | 34.3%  | 33.0%  |
| PgC (mutant bacteria)                   | CD11c+ MHC II     | 18.6% | 40.1%  | 39.3%  |
|                                         | CD40 + MHC II     | 16.4% | 37.0%  | 37.5%  |
|                                         | CD86 + MHC II     | 19.0% | 43.2%  | 39.2%  |
| W50 (wild-type bacteria)                | CD11c+ MHC II     | 10.4% | 39.6%  | 42.4%  |
|                                         | CD40 + MHC II     | 6.9%  | 27.1%  | 42.2%  |
|                                         | CD86 + MHC II     | 9.1%  | 39.3%  | 44.1%  |

Fig S3C. Maturation of dendritic cells - summary
